# Supplementary material for: Trans-resveratrol reduced hepatic oxidative stress in an animal model without inducing an upregulation of nuclear factor erythroid 2-related factor 2
Source: PubMed Central journal article supplement — J Clin Biochem Nutr. 2024 Apr 27;75(1):40–5. doi: 10.3164/jcbn.23-124 (PMC11273272; doi:10.3164/jcbn.23-124), 2024-04-27
Supplement: jcbn23-124SF01.pdf [file jcbn23-124SF01.pdf]

FLD1 A. Ex=310. Em=403 (TAMIREs\RESV06122019 2019-12-09 12-59-28\013-1301. D)  
FLD1 A. Ex=310. Em=403 (TAMIREs\RESV06122019 2019-12-09 12-59-28\010-1001. D)

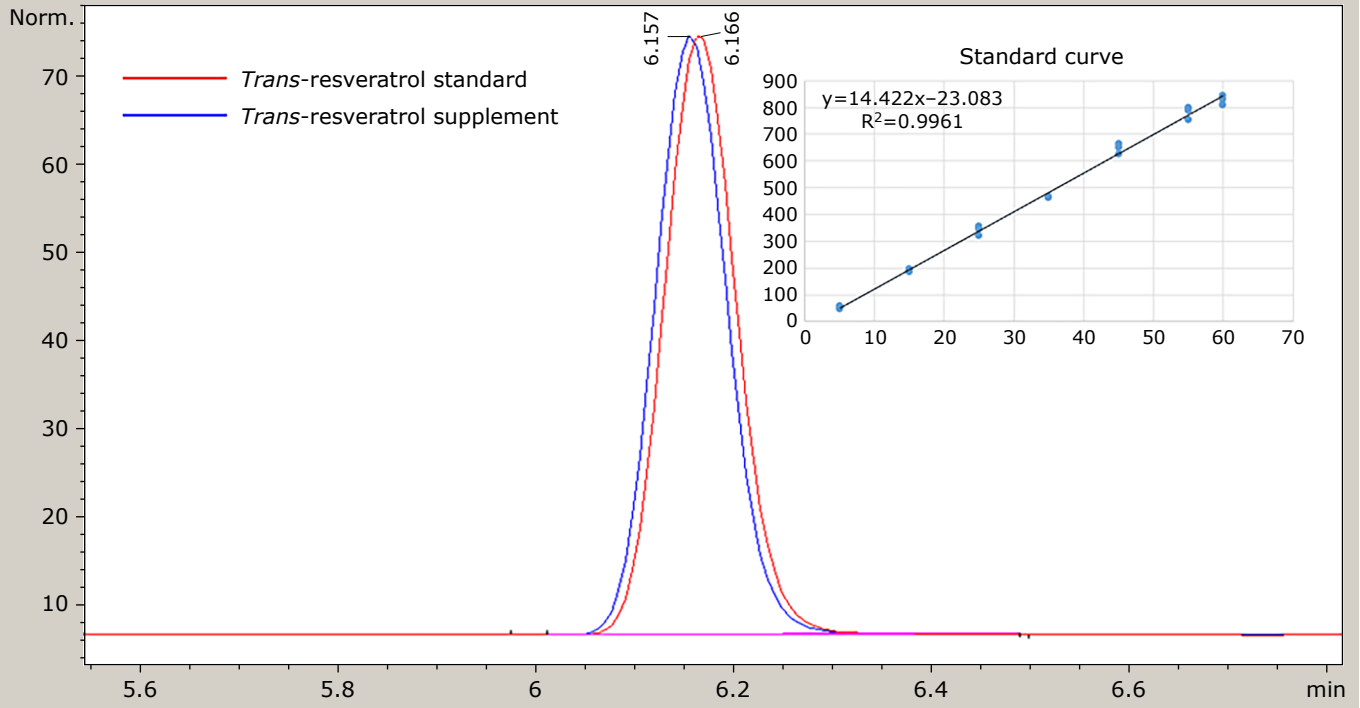

Supplemental Fig. 1. Peak of *trans*-resveratrol sample applied in the biological assay and standard (SIGMA - PHL89539).
