# Supplementary material for: Trans-resveratrol reduced hepatic oxidative stress in an animal model without inducing an upregulation of nuclear factor erythroid 2-related factor 2
Source: PubMed Central journal article supplement — J Clin Biochem Nutr. 2024 Apr 27;75(1):40–5. doi: 10.3164/jcbn.23-124 (PMC11273272; doi:10.3164/jcbn.23-124), 2024-04-27
Supplement: jcbn23-124SM01.pdf [file jcbn23-124SM01.pdf]

## Supplemental Methods

**Trans-resveratrol determination.** The *trans*-resveratrol analysis was performed using high-performance liquid chromatography (HPLC; Agilent Technologies 1200 Series) following the method described by Piñeiro, Palma, Barroso with modifications.<sup>(38)</sup> A solution of *trans*-resveratrol acquired to this study was evaluated in three concentrations (5.0, 25.0, and 60.0 mg/L) in methanol. Samples (30  $\mu$ l) were injected in a reverse-phase C18 column (Agilent, Santa Clara, CA, 150  $\times$  4.6 mm; 5  $\mu$ m) and quantified by fluorescence detection at an excitation wavelength

of 310 nm and emission of 403 nm. The chromatographic analysis was performed using a mobile phase consisting of acetonitrile (A) and an aqueous formic acid solution 0.1% (B) with the following gradient: 8–100% of solvent A and 92–0% of solvent B in 0–11 min, at a flow rate of 1.0 ml/min. Column temperature was kept at 37°C. The identification of *trans*-resveratrol was carried out by comparing the retention time with the pure standard (Sigma - PHL89539), and the quantification was performed using a standard curve (5–60 mg/L;  $r = 0.9961$ ). Analysis was run in triplicate.
