# Supplementary material for: Trans-resveratrol reduced hepatic oxidative stress in an animal model without inducing an upregulation of nuclear factor erythroid 2-related factor 2
Source: PubMed Central journal article supplement — J Clin Biochem Nutr. 2024 Apr 27;75(1):40–5. doi: 10.3164/jcbn.23-124 (PMC11273272; doi:10.3164/jcbn.23-124), 2024-04-27
Supplement: jcbn23-124ST01.pdf [file jcbn23-124ST01.pdf]

**Supplemental Table 1.** Expected and observed concentration of *trans*-resveratrol sample applied in the biological assay

| Expected concentration (mg/L) | Observed concentration <sup>a</sup> (mg/L) |
|-------------------------------|--------------------------------------------|
| 5                             | 5.46 ± 0.23                                |
| 25                            | 26.28 ± 0.56                               |
| 60                            | 61.72 ± 4.26                               |

<sup>a</sup>Standard curve: 5–60 mg/L;  $R^2 = 0.9961$ . Values expressed as mean ± SD.
