# Supplementary material for: Trans-resveratrol reduced hepatic oxidative stress in an animal model without inducing an upregulation of nuclear factor erythroid 2-related factor 2
Source: PubMed Central journal article supplement — J Clin Biochem Nutr. 2024 Apr 27;75(1):40–5. doi: 10.3164/jcbn.23-124 (PMC11273272; doi:10.3164/jcbn.23-124), 2024-04-27
Supplement: jcbn23-124ST02.pdf [file jcbn23-124ST02.pdf]

**Supplemental Table 2.** Composition of the diets

| Ingredient (g)                    | AIN93M <sup>a</sup> | WESTERN <sup>b</sup> |
|-----------------------------------|---------------------|----------------------|
| Cornstarch                        | 620.692             | —                    |
| Maltodextrin                      | —                   | 161.530              |
| Casein (>85% protein)             | 140.000             | 258.448              |
| Sucrose                           | 100.000             | 88.900               |
| Lard                              | —                   | 316.600              |
| Soybean oil (no additives)        | 40.000              | 32.300               |
| Fiber                             | 50.000              | 64.600               |
| Cholesterol                       | —                   | 6.250                |
| Mineral mix (AIN93M – MX)         | 35.000              | —                    |
| Mineral mix (S10026)              | —                   | 12.900               |
| DiCalcium Phosphate               | —                   | 16.800               |
| Calcium carbonate                 | —                   | 7.100                |
| Potassium citrate                 | —                   | 21.300               |
| Vitamin mix (AIN93M – VX)         | 10.000              | —                    |
| Vitamin mix (V10001)              | —                   | 12.900               |
| L-Cistine                         | 1.800               | 3.870                |
| Choline bitartrate (41.1% colina) | 2.500               | 2.600                |
| TBHQ (Terq-butyhydroquinone)      | 0.008               | —                    |
| Total                             | 1.000.000           | 1.000.000            |

<sup>a</sup>Based on Reeves *et al.*<sup>(19)</sup> <sup>b</sup>Western diet (D12492) according to Research Diets (2017).
