# Supplementary material for: Trans-resveratrol reduced hepatic oxidative stress in an animal model without inducing an upregulation of nuclear factor erythroid 2-related factor 2
Source: PubMed Central journal article supplement — J Clin Biochem Nutr. 2024 Apr 27;75(1):40–5. doi: 10.3164/jcbn.23-124 (PMC11273272; doi:10.3164/jcbn.23-124), 2024-04-27
Supplement: jcbn23-124ST03.pdf [file jcbn23-124ST03.pdf]

**Supplemental Table 3.** Chemical composition of the diets

| Diet           | Nutrients <sup>a</sup> |             |              |              |                           |                     |
|----------------|------------------------|-------------|--------------|--------------|---------------------------|---------------------|
|                | Moisture               | Ash         | Lipid        | Protein      | Carbohydrate <sup>b</sup> | Energy <sup>c</sup> |
| AIN93M – CONT  | 10.07 ± 0.12           | 3.05 ± 0.00 | 6.35 ± 0.52  | 16.17 ± 0.32 | 64.63 ± 0.43              | 380.75 ± 0.31       |
| AIM93M – LRD   | 11.35 ± 0.03           | 3.05 ± 0.13 | 6.21 ± 0.54  | 13.62 ± 0.63 | 65.76 ± 1.09              | 371.74 ± 0.29       |
| Western – CONT | 3.80 ± 0.12            | 2.45 ± 0.11 | 36.46 ± 2.54 | 28.36 ± 0.99 | 28.94 ± 2.30              | 564.22 ± 5.97       |
| Western – LRD  | 3.82 ± 0.03            | 3.00 ± 0.06 | 37.30 ± 0.27 | 31.58 ± 0.94 | 24.29 ± 0.78              | 559.20 ± 1.68       |

<sup>a</sup>Values expressed in mean ± SD. <sup>b</sup>Obtained by difference. <sup>c</sup>Energy in kcal/100 g. Supplementary reference. <sup>(38)</sup>
